# Supplementary material
Source: Springer Nature journal article supplement (https://www.springermedizin.de/resource/supplementary/12889_2013_6781_MOESM2_ESM.pdf/9498990)

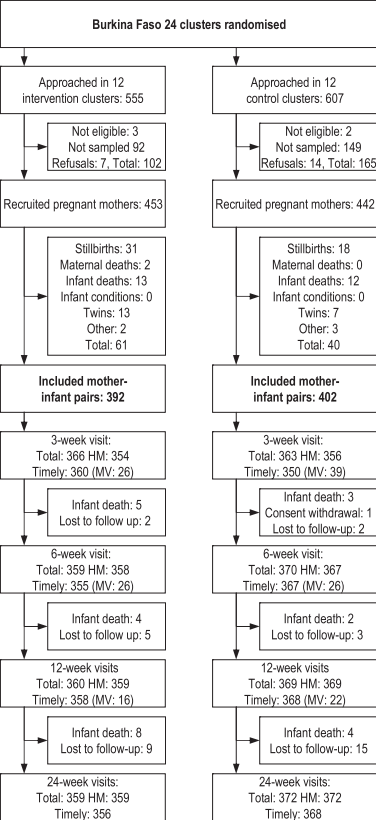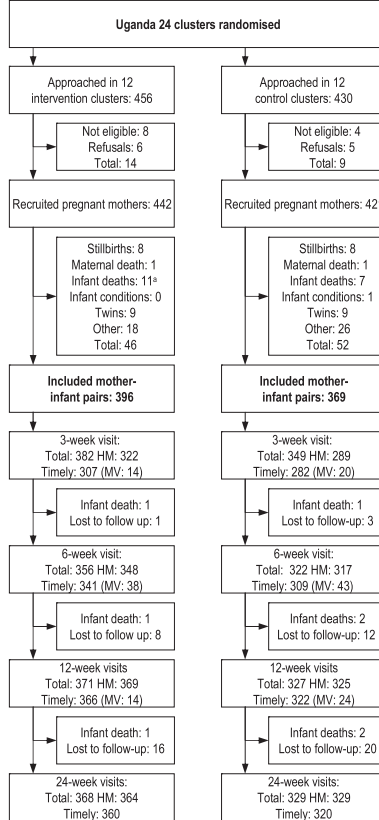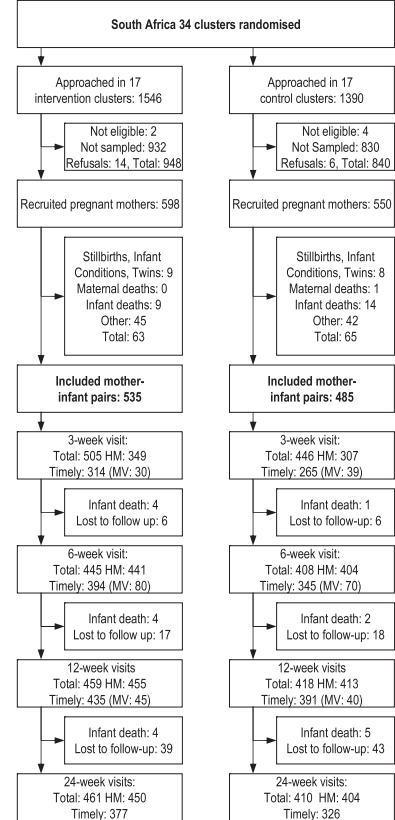

\*MV=Missed visit  
\*HM=Have measurement for analysis

\*Text: \* Infant and maternal death combined

Supplement: MOESM2 [file 9498990]
